# Supplementary material for: Feature selection and classifier performance on diverse bio- logical datasets
Source: PubMed Central journal article supplement (PMC4248652; doi:10.1186/1471-2105-15-s13-s4), 2014-11-13
Supplement: 1471-2105-15-S13-S4-S1.pdf [file 1471-2105-15-S13-S4-S1.pdf]

### **Additional file 1 — Supplementary methods**

The eight NCI-60 cell-lines were used as the training data for marker set sizes 8, 16, 32, 64, and 96. The nine primary tumor cohorts from the TCGA data set were normalized to the NCI-60 data set using quantile normalization using NCI-60 data as the target distribution.

As discussed in the Validation Strategy section, a nested 5-fold cross validation with repeating the outer cross validation 100 times was utilized to train the NCI-60 data set, using the same feature selection and classifier methods described in the main text. Before running the nested k-fold cross validation, the training data was filtered to the top 1,000 features ranked using the F-statistic. The resulting top models used for feature selection and classification is shown in Supplementary Table ???. For each marker set size, the NCI-60 training data is used to extract the features and used as the reference data set for classification. The resulting accuracy of the validation experiment is defined as the number of correct predictions divided by the number of total predictions.

## Additional file 1 — Supplementary tables

Table 1: Datatypes Downloaded from CellMiner

|          | <u>Data Type</u>          | <u>CellMiner Data Type</u> | <u>Normalization Option</u> | <u>CellMiner File Name</u>                    |
|----------|---------------------------|----------------------------|-----------------------------|-----------------------------------------------|
| SNP      | DNA: Affy 500K SNP        | CRLMM                      |                             | nci60_DNA__Affy_500K_SNP_CRLMM.txt.zip        |
| mRNA     | RNA: Affy HuEx 1.0        | GCRMA                      |                             | nci60_RNA__Affy_HuEx_1.0_GCRMA.txt.zip        |
| CNV      | DNA: aCGH Agilent 44K     | AgilentFE                  |                             | nci60_DNA__aCGH_Agilent_44K_AgilentFE.txt.zip |
| microRNA | RNA: microRNA OSU V3 chip | log2                       |                             | nci60_RNA__microRNA_OSU_V3_chip_log2.txt.zip  |
| Protein  | Protein: Lysate Array     | log2                       |                             | nci60_Protein__Lysate_Array_log2.txt.zip      |

Data files and normalization strategy used for each data set

Table 2: Cell Lines used in Analysis

| Data Type | Breast        | CNS        | Colon       | Non-Small Cell Lung | Leukemia     | Melanoma      | Ovarian       | Renal      |
|-----------|---------------|------------|-------------|---------------------|--------------|---------------|---------------|------------|
| mRNA      | BR.MCF7       | CNS.SF_268 | CO.COLO205  | LC.A549             | LE.CCRF_CEM  | ME.LOXIMVI    | OV.IGROV1     | RE.786_0   |
|           | BR.MDA_MB_231 | CNS.SF_295 | CO.HCC_2998 | LC.EKVX             | LE.HL_60     | ME.MALME_3M   | OV.OVCAR_3    | RE.A498    |
|           | BR.HS578T     | CNS.SNB_19 | CO.HCT_116  | LC.HOP_62           | LE.K_562     | ME.M14        | OV.OVCAR_4    | RE.ACHN    |
|           | BR.BT_549     | CNS.SNB_75 | CO.HCT_15   | LC.HOP_92           | LE.MOLT_4    | ME.SK_MEL_2   | OV.OVCAR_5    | RE.CAKL1   |
|           | BR.T47D       | CNS.U251   | CO.HT29     | LC.NCIH226          | LE.RPML_8226 | ME.SK_MEL_28  | OV.OVCAR_8    | RE.RXF_393 |
|           |               |            | CO.KM12     | LC.NCIH23           | LE.SR        | ME.SK_MEL_5   | OV.SK_OV_3    | RE.SN12C   |
|           |               |            | CO.SW_620   | LC.NCIH322M         |              | ME.UACC_257   | OV.NCIADR_RES | RE.TK_10   |
|           |               |            |             | LC.NCIH460          |              | ME.UACC_62    |               | RE.UO_31   |
|           |               |            |             | LC.NCIH522          |              | ME.MDA_MB_435 |               |            |
|           |               |            |             |                     |              | ME.MDA_N      |               |            |
| Protein   | BR.MCF7       | CNS.SF_268 | CO.COLO205  | LC.A549             | LE.CCRF_CEM  | ME.LOXIMVI    | OV.IGROV1     | RE.786_0   |
|           | BR.MDA_MB_231 | CNS.SF_295 | CO.HCC_2998 | LC.EKVX             | LE.HL_60     | ME.MALME_3M   | OV.OVCAR_3    | RE.A498    |
|           | BR.HS578T     | CNS.SF_539 | CO.HCT_116  | LC.HOP_62           | LE.K_562     | ME.M14        | OV.OVCAR_4    | RE.ACHN    |
|           | BR.BT_549     | CNS.SNB_19 | CO.HCT_15   | LC.HOP_92           | LE.MOLT_4    | ME.SK_MEL_2   | OV.OVCAR_5    | RE.CAKL1   |
|           | BR.T47D       | CNS.SNB_75 | CO.HT29     | LC.NCIH226          | LE.RPML_8226 | ME.SK_MEL_28  | OV.OVCAR_8    | RE.RXF_393 |
|           |               |            | CO.KM12     | LC.NCIH23           | LE.SR        | ME.SK_MEL_5   | OV.SK_OV_3    | RE.SN12C   |
|           |               |            | CO.SW_620   | LC.NCIH322M         |              | ME.UACC_257   | OV.NCIADR_RES | RE.TK_10   |
|           |               |            |             | LC.NCIH460          |              | ME.UACC_62    |               | RE.UO_31   |
|           |               |            |             | LC.NCIH522          |              | ME.MDA_MB_435 |               |            |
|           |               |            |             |                     |              | ME.MDA_N      |               |            |
| microRNA  | BR.MCF7       | CNS.SF_268 | CO.COLO205  | LC.A549             | LE.CCRF_CEM  | ME.LOXIMVI    | OV.IGROV1     | RE.786_0   |
|           | BR.MDA_MB_231 | CNS.SF_295 | CO.HCC_2998 | LC.EKVX             | LE.HL_60     | ME.MALME_3M   | OV.OVCAR_3    | RE.A498    |
|           | BR.HS578T     | CNS.SF_539 | CO.HCT_116  | LC.HOP_62           | LE.K_562     | ME.M14        | OV.OVCAR_4    | RE.ACHN    |
|           | BR.BT_549     | CNS.SNB_19 | CO.HCT_15   | LC.HOP_92           | LE.MOLT_4    | ME.SK_MEL_2   | OV.OVCAR_5    | RE.CAKL1   |
|           | BR.T47D       | CNS.SNB_75 | CO.HT29     | LC.NCIH226          | LE.RPML_8226 | ME.SK_MEL_28  | OV.OVCAR_8    | RE.RXF_393 |
|           |               |            | CO.KM12     | LC.NCIH23           | LE.SR        | ME.SK_MEL_5   | OV.SK_OV_3    | RE.SN12C   |
|           |               |            | CO.SW_620   | LC.NCIH322M         |              | ME.UACC_257   | OV.NCIADR_RES | RE.TK_10   |
|           |               |            |             | LC.NCIH460          |              | ME.UACC_62    |               | RE.UO_31   |
|           |               |            |             | LC.NCIH522          |              | ME.MDA_MB_435 |               |            |
|           |               |            |             |                     |              | ME.MDA_N      |               |            |
| SNP       | BR.MCF7       | CNS.SF_268 | CO.COLO205  | LC.A549             | LE.CCRF_CEM  | ME.LOXIMVI    | OV.IGROV1     | RE.786_0   |
|           | BR.MDA_MB_231 | CNS.SF_295 | CO.HCC_2998 | LC.EKVX             | LE.HL_60     | ME.MALME_3M   | OV.OVCAR_3    | RE.A498    |
|           | BR.HS578T     | CNS.SF_539 | CO.HCT_116  | LC.HOP_62           | LE.K_562     | ME.M14        | OV.OVCAR_4    | RE.ACHN    |
|           | BR.BT_549     | CNS.SNB_19 | CO.HCT_15   | LC.HOP_92           | LE.MOLT_4    | ME.SK_MEL_2   | OV.OVCAR_5    | RE.CAKL1   |
|           | BR.T47D       | CNS.SNB_75 | CO.HT29     | LC.NCIH226          | LE.RPML_8226 | ME.SK_MEL_28  | OV.OVCAR_8    | RE.RXF_393 |
|           |               |            | CO.KM12     | LC.NCIH23           | LE.SR        | ME.SK_MEL_5   | OV.SK_OV_3    | RE.SN12C   |
|           |               |            | CO.SW_620   | LC.NCIH322M         |              | ME.UACC_257   | OV.NCIADR_RES | RE.TK_10   |
|           |               |            |             | LC.NCIH460          |              | ME.UACC_62    |               | RE.UO_31   |
|           |               |            |             | LC.NCIH522          |              | ME.MDA_MB_435 |               |            |
|           |               |            |             |                     |              | ME.MDA_N      |               |            |
| CNV       | BR.MCF7       | CNS.SF_268 | CO.COLO205  | LC.A549             | LE.CCRF_CEM  | ME.LOXIMVI    | OV.IGROV1     | RE.786_0   |
|           | BR.MDA_MB_231 | CNS.SF_295 | CO.HCC_2998 | LC.EKVX             | LE.HL_60     | ME.MALME_3M   | OV.OVCAR_3    | RE.A498    |
|           | BR.HS578T     | CNS.SF_539 | CO.HCT_116  | LC.HOP_62           | LE.K_562     | ME.M14        | OV.OVCAR_4    | RE.ACHN    |
|           | BR.BT_549     | CNS.SNB_19 | CO.HCT_15   | LC.HOP_92           | LE.MOLT_4    | ME.SK_MEL_2   | OV.OVCAR_5    | RE.SN12C   |
|           | BR.T47D       | CNS.SNB_75 | CO.HT29     | LC.NCIH226          | LE.RPML_8226 | ME.SK_MEL_28  | OV.OVCAR_8    | RE.TK_10   |
|           |               |            | CO.KM12     | LC.NCIH23           | LE.SR        | ME.SK_MEL_5   | OV.SK_OV_3    | RE.UO_31   |
|           |               |            | CO.SW_620   | LC.NCIH322M         |              | ME.UACC_257   | OV.NCIADR_RES |            |
|           |               |            |             | LC.NCIH460          |              | ME.UACC_62    |               |            |
|           |               |            |             | LC.NCIH522          |              | ME.MDA_MB_435 |               |            |
|           |               |            |             |                     |              | ME.MDA_N      |               |            |

The cell lines used in the cross validation experiment.

Table 3: Feature Selection Parameters

| FS Method     | Parameter               | Description                                                                          | Values                                                                              |
|---------------|-------------------------|--------------------------------------------------------------------------------------|-------------------------------------------------------------------------------------|
| Anova         | NA                      | No parameters                                                                        |                                                                                     |
| RFE           | Estimator               | The supervised learning estimator                                                    | Support Vector Classification (SVC) with a linear kernel for the decision functions |
|               | Estimator Parameter - C | The penalty parameter of the error term                                              | 0.25, 1, 4, 16, 64, 256                                                             |
| Random Forest | Max Features            | Function to determine the number of features to consider when looking for best split | sqrt and log2                                                                       |
|               | N Estimators            | The number of trees to be used in the forest                                         | 10, 50, 100, 250                                                                    |
| Extra Trees   | Max Features            | Function to determine the number of features to consider when looking for best split | sqrt and log2                                                                       |
|               | N Estimators            | The number of trees to be used in the forest                                         | 10, 50, 100, 250                                                                    |

The tested parameters for each feature selection algorithm.

Table 4: Classification Parameters

| CL Method              | Parameter                | Description                                                                          | Values                                                                                                                |
|------------------------|--------------------------|--------------------------------------------------------------------------------------|-----------------------------------------------------------------------------------------------------------------------|
| Support Vector Machine | Kernel                   | Function to use as a decision function                                               | RBF and Linear                                                                                                        |
|                        | RBF Gamma                | Kernel coefficient for RBF                                                           | 0.03125, 0.125, 0.5, 2, 8, 32, 128, and 512                                                                           |
|                        | RBF C                    | Penalty Parameter of the error term                                                  | 0.03125, 0.125, 0.5, 2, 8, 32, 128, and 512                                                                           |
|                        | Linear C                 | Penalty Parameter of the error term                                                  | 0.03125, 0.125, 0.5, 2, 8, 32, 128, and 512                                                                           |
| Logistic Regression    | Penalty                  | Norm used in the penalization                                                        | l2                                                                                                                    |
|                        | C                        | Inverse of regularization strength; smaller values specify stronger regularization   | 0.25, 1, 4, 16, 64, and 256                                                                                           |
| Decision Trees         | Max Features             | Function to determine the number of features to consider when looking for best split | sqrt and log2                                                                                                         |
| Random Forest          | Max Features             | Function to determine the number of features to consider when looking for best split | sqrt and log2                                                                                                         |
|                        | N Estimators             | Number of trees to be used in the forest                                             | 10, 50, 100, 250                                                                                                      |
| Extra Trees            | Max Features             | Function to determine the number of features to consider when looking for best split | sqrt and log2                                                                                                         |
|                        | N Estimators             | Number of trees to be used in the forest                                             | 10, 50, 100, 250                                                                                                      |
| Gradient Boosting      | N Boosting Stages        | Number of boosting stages to perform                                                 | 100, 250, and 500                                                                                                     |
|                        | Max Depth                | Maximum depth of the individual regression estimators                                | 3, 5, 7                                                                                                               |
| K-nearest Neighbors    | Compute Nearest Neighbor | Algorithm used to compute the nearest neighbors                                      | BallTree and KDtree                                                                                                   |
|                        | Distance Function        | Function used to calculate the distance                                              | Euclidean and Manhattan                                                                                               |
|                        | Weight Function          | A function to apply weights to the points                                            | Uniform and Inverse weighting based on the distance to their neighbors; the closer the distance the better the score. |
| Cosine                 | NA                       | No parameters                                                                        |                                                                                                                       |
| Correlation            | NA                       | No parameters                                                                        |                                                                                                                       |

The tested parameters for each classification algorithm.

Table 5: Mean AUC per Model Grouped by Platform and Marker Set Size

|       |       | Marker Set Size |               |               |         |               |               |          |               |               |      |               |               |      |               |               |
|-------|-------|-----------------|---------------|---------------|---------|---------------|---------------|----------|---------------|---------------|------|---------------|---------------|------|---------------|---------------|
|       |       | mRNA            |               |               | Protein |               |               | microRNA |               |               | SNP  |               |               | CNV  |               |               |
| 8     | RFE   | ET              | <b>0.9585</b> | RFE           | ET      | <b>0.9426</b> | RFE           | RF       | <b>0.8352</b> | RFE           | ET   | <b>0.8598</b> | RFE           | LR   | <b>0.7198</b> |               |
|       | RFE   | RF              | 0.9554        | ET            | ET      | 0.9394        | RFE           | SVM      | 0.8352        | RFE           | RF   | 0.8591        | ET            | LR   | 0.7115        |               |
|       | RFE   | SVM             | 0.9521        | RFE           | RF      | 0.9382        | RFE           | KNN      | 0.8295        | RFE           | SVM  | 0.8321        | RF            | LR   | 0.71          |               |
|       | RFE   | LR              | 0.951         | RF            | ET      | 0.9376        | RFE           | ET       | 0.8275        | ET            | ET   | 0.8295        | RFE           | ET   | 0.691         |               |
|       | RFE   | KNN             | 0.9467        | ET            | RF      | 0.9312        | Anova         | SVM      | 0.8089        | ET            | RF   | 0.8247        | RFE           | RF   | 0.6802        |               |
|       | RFE   | Cos             | 0.9397        | RF            | RF      | 0.9272        | Anova         | LR       | 0.8051        | RF            | ET   | 0.8177        | RFE           | SVM  | 0.6702        |               |
|       | RFE   | Corr            | 0.9299        | RFE           | SVM     | 0.922         | RF            | ET       | 0.8028        | RF            | RF   | 0.817         | ET            | ET   | 0.6698        |               |
|       | ET    | LR              | 0.9114        | RF            | SVM     | 0.9187        | RF            | RF       | 0.8027        | RFE           | KNN  | 0.8161        | RFE           | KNN  | 0.6681        |               |
|       | RF    | LR              | 0.9113        | ET            | SVM     | 0.9177        | RFE           | LR       | 0.8021        | RF            | LR   | 0.816         | ET            | RF   | 0.6648        |               |
|       | RF    | ET              | 0.9093        | RF            | LR      | 0.9168        | RF            | LR       | 0.802         | RFE           | LR   | 0.8138        | RF            | ET   | 0.6631        |               |
|       | RFE   | GB              | 0.9076        | ET            | LR      | 0.9165        | RFE           | GB       | 0.7962        | ET            | LR   | 0.8114        | RF            | RF   | 0.663         |               |
|       | ET    | ET              | 0.9061        | ET            | KNN     | 0.9161        | RF            | SVM      | 0.7951        | ET            | SVM  | 0.8006        | ET            | KNN  | 0.6543        |               |
|       | ET    | RF              | 0.9029        | RF            | KNN     | 0.9156        | ET            | RF       | 0.7947        | RF            | SVM  | 0.7955        | RFE           | GB   | 0.6528        |               |
|       | RF    | RF              | 0.9006        | Anova         | ET      | 0.9076        | ET            | ET       | 0.7883        | ET            | KNN  | 0.7826        | RF            | KNN  | 0.6463        |               |
|       | RF    | SVM             | 0.8969        | RFE           | KNN     | 0.9039        | RF            | KNN      | 0.7878        | RFE           | Cos  | 0.7719        | ET            | SVM  | 0.6304        |               |
|       | ET    | SVM             | 0.8875        | RFE           | LR      | 0.8986        | RFE           | Cos      | 0.7867        | RF            | KNN  | 0.7712        | RF            | GB   | 0.6292        |               |
|       | ET    | KNN             | 0.8806        | Anova         | RF      | 0.8925        | Anova         | ET       | 0.7867        | RFE           | Corr | 0.7698        | RF            | SVM  | 0.6217        |               |
|       | RF    | KNN             | 0.8788        | Anova         | LR      | 0.8808        | Anova         | RF       | 0.7848        | Anova         | RF   | 0.7659        | ET            | GB   | 0.6188        |               |
|       | ET    | GB              | 0.8738        | Anova         | KNN     | 0.8701        | RFE           | Corr     | 0.7812        | Anova         | ET   | 0.7604        | Anova         | LR   | 0.5883        |               |
|       | RF    | Cos             | 0.8647        | RFE           | Cos     | 0.8693        | Anova         | KNN      | 0.7806        | Anova         | SVM  | 0.753         | RFE           | Corr | 0.5756        |               |
|       | RF    | GB              | 0.8619        | Anova         | SVM     | 0.8598        | RF            | Corr     | 0.7762        | RF            | GB   | 0.7289        | Anova         | KNN  | 0.5722        |               |
|       | ET    | Cos             | 0.8603        | RF            | Cos     | 0.852         | ET            | KNN      | 0.7738        | ET            | Corr | 0.7239        | RF            | Corr | 0.5721        |               |
|       | RF    | Corr            | 0.8518        | ET            | Cos     | 0.8502        | ET            | SVM      | 0.7724        | ET            | Cos  | 0.722         | RFE           | DT   | 0.5663        |               |
|       | ET    | Corr            | 0.8475        | RFE           | Corr    | 0.8381        | Anova         | Corr     | 0.7722        | Anova         | Corr | 0.7197        | ET            | Corr | 0.5646        |               |
|       | RFE   | DT              | 0.7807        | ET            | Corr    | 0.8202        | Anova         | Cos      | 0.7662        | Anova         | LR   | 0.7179        | Anova         | ET   | 0.5637        |               |
|       | ET    | DT              | 0.7325        | RF            | Corr    | 0.8132        | RF            | Cos      | 0.7624        | RF            | Cos  | 0.7172        | Anova         | RF   | 0.5636        |               |
|       | RF    | DT              | 0.7319        | ET            | GB      | 0.8132        | ET            | LR       | 0.7602        | Anova         | KNN  | 0.7166        | ET            | DT   | 0.5628        |               |
|       | Anova | SVM             | 0.6732        | RF            | GB      | 0.8101        | ET            | GB       | 0.7537        | RFE           | GB   | 0.7146        | RF            | DT   | 0.5587        |               |
|       | Anova | ET              | 0.6588        | RFE           | GB      | 0.8062        | RF            | GB       | 0.7487        | RF            | Corr | 0.701         | Anova         | SVM  | 0.5549        |               |
|       | Anova | RF              | 0.651         | Anova         | Cos     | 0.7996        | Anova         | GB       | 0.7484        | Anova         | Corr | 0.6686        | Anova         | GB   | 0.554         |               |
|       | Anova | LR              | 0.6368        | Anova         | GB      | 0.7656        | ET            | Corr     | 0.7441        | Anova         | Cos  | 0.6673        | RFE           | Cos  | 0.5457        |               |
|       | Anova | Corr            | 0.6191        | Anova         | Corr    | 0.7562        | ET            | Cos      | 0.7422        | RFE           | DT   | 0.6321        | RF            | Cos  | 0.5424        |               |
|       | Anova | KNN             | 0.6184        | RFE           | DT      | 0.7197        | RFE           | DT       | 0.6584        | Anova         | GB   | 0.6317        | ET            | Cos  | 0.5392        |               |
|       | Anova | GB              | 0.6146        | RF            | DT      | 0.7152        | Anova         | DT       | 0.6473        | RF            | DT   | 0.6195        | Anova         | DT   | 0.5343        |               |
|       | Anova | Cos             | 0.6134        | ET            | DT      | 0.7115        | ET            | DT       | 0.6389        | ET            | DT   | 0.6173        | Anova         | Corr | 0.5213        |               |
|       | Anova | DT              | 0.5647        | Anova         | DT      | 0.6799        | RF            | DT       | 0.6385        | Anova         | DT   | 0.5769        | Anova         | Cos  | 0.5164        |               |
|       | 16    | RFE             | ET            | <b>0.972</b>  | RFE     | ET            | <b>0.9666</b> | RFE      | SVM           | <b>0.8758</b> | RFE  | ET            | <b>0.922</b>  | ET   | LR            | <b>0.7616</b> |
|       |       | RFE             | LR            | 0.9709        | ET      | ET            | 0.9582        | RFE      | KNN           | 0.8704        | RFE  | RF            | 0.9162        | RFE  | LR            | 0.7607        |
|       |       | RFE             | RF            | 0.9681        | RFE     | RF            | 0.9565        | RFE      | RF            | 0.8671        | RFE  | SVM           | 0.9111        | RF   | LR            | 0.7468        |
|       |       | RFE             | SVM           | 0.968         | RF      | ET            | 0.9539        | RFE      | ET            | 0.8597        | RFE  | KNN           | 0.9033        | RFE  | ET            | 0.7159        |
| RFE   |       | Cos             | 0.9663        | ET            | RF      | 0.9482        | RFE           | LR       | 0.8535        | ET            | ET   | 0.8997        | RFE           | RF   | 0.7086        |               |
| RFE   |       | KNN             | 0.9604        | ET            | KNN     | 0.9435        | Anova         | SVM      | 0.8496        | RFE           | LR   | 0.897         | RFE           | SVM  | 0.7067        |               |
| RF    |       | LR              | 0.9588        | RF            | RF      | 0.9414        | Anova         | LR       | 0.8439        | RF            | ET   | 0.896         | ET            | ET   | 0.7009        |               |
| RFE   |       | Corr            | 0.9576        | RF            | KNN     | 0.9413        | RFE           | Cos      | 0.8407        | ET            | RF   | 0.8914        | ET            | RF   | 0.7007        |               |
| RF    |       | ET              | 0.9514        | ET            | SVM     | 0.9407        | Anova         | RF       | 0.8361        | RF            | RF   | 0.8861        | RF            | ET   | 0.6995        |               |
| ET    |       | LR              | 0.9508        | RF            | SVM     | 0.9381        | Anova         | KNN      | 0.8349        | RF            | LR   | 0.878         | RF            | RF   | 0.699         |               |
| ET    |       | ET              | 0.9482        | RFE           | SVM     | 0.938         | RFE           | Corr     | 0.8325        | ET            | LR   | 0.8767        | RFE           | GB   | 0.6899        |               |
| ET    |       | RF              | 0.9468        | ET            | LR      | 0.9305        | Anova         | ET       | 0.8323        | ET            | SVM  | 0.8766        | ET            | SVM  | 0.6896        |               |
| RF    |       | RF              | 0.9453        | Anova         | ET      | 0.9302        | RF            | LR       | 0.8295        | RF            | SVM  | 0.8675        | ET            | KNN  | 0.6827        |               |
| RF    |       | SVM             | 0.9393        | RFE           | KNN     | 0.925         | ET            | RF       | 0.8273        | ET            | KNN  | 0.8593        | RF            | SVM  | 0.6799        |               |
| RFE   |       | GB              | 0.9306        | Anova         | RF      | 0.9193        | RF            | ET       | 0.8265        | RFE           | Corr | 0.8591        | RF            | KNN  | 0.6743        |               |
| RF    |       | KNN             | 0.9242        | RF            | LR      | 0.9192        | RF            | KNN      | 0.8256        | RF            | KNN  | 0.8545        | RFE           | KNN  | 0.6739        |               |
| ET    |       | KNN             | 0.9242        | RFE           | LR      | 0.9086        | Anova         | Corr     | 0.8252        | RFE           | Cos  | 0.8508        | ET            | GB   | 0.6585        |               |
| ET    |       | SVM             | 0.9233        | Anova         | LR      | 0.9076        | RF            | RF       | 0.8243        | Anova         | RF   | 0.8142        | RF            | GB   | 0.6566        |               |
| RF    |       | Cos             | 0.923         | Anova         | KNN     | 0.902         | RF            | SVM      | 0.8234        | Anova         | ET   | 0.7982        | RFE           | Corr | 0.621         |               |
| RF    |       | Corr            | 0.9224        | Anova         | SVM     | 0.8914        | Anova         | Cos      | 0.8226        | ET            | Corr | 0.7898        | Anova         | LR   | 0.6089        |               |
| ET    |       | GB              | 0.915         | RFE           | Cos     | 0.8871        | RF            | Corr     | 0.8212        | ET            | Cos  | 0.7885        | RFE           | Cos  | 0.6075        |               |
| RF    |       | GB              | 0.9145        | ET            | Cos     | 0.8836        | ET            | ET       | 0.8156        | RF            | Cos  | 0.7812        | RF            | Corr | 0.6066        |               |
| ET    |       | Cos             | 0.9087        | RF            | Cos     | 0.8744        | ET            | KNN      | 0.8137        | Anova         | SVM  | 0.7779        | ET            | Corr | 0.6061        |               |
| ET    |       | Corr            | 0.906         | RFE           | Corr    | 0.8641        | RFE           | GB       | 0.8058        | RF            | Corr | 0.7717        | Anova         | KNN  | 0.5878        |               |
| RFE   |       | DT              | 0.8129        | ET            | Corr    | 0.8618        | ET            | SVM      | 0.803         | RF            | GB   | 0.7596        | Anova         | RF   | 0.5829        |               |
| ET    |       | DT              | 0.794         | RF            | Corr    | 0.8552        | ET            | LR       | 0.7982        | Anova         | LR   | 0.7511        | RFE           | DT   | 0.5768        |               |
| RF    |       | DT              | 0.7857        | Anova         | Cos     | 0.8424        | RF            | Cos      | 0.7968        | ET            | GB   | 0.7426        | Anova         | ET   | 0.5764        |               |
| Anova |       | SVM             | 0.7232        | Anova         | Corr    | 0.8266        | ET            | Corr     | 0.7945        | Anova         | KNN  | 0.733         | Anova         | SVM  | 0.575         |               |
| Anova |       | ET              | 0.7192        | ET            | GB      | 0.8189        | ET            | Cos      | 0.7897        | RFE           | GB   | 0.7078        | RF            | DT   | 0.5726        |               |
| Anova |       | LR              | 0.7157        | RFE           | GB      | 0.8169        | Anova         | GB       | 0.7858        | Anova         | Cos  | 0.6791        | Anova         | GB   | 0.57          |               |
| Anova |       | RF              | 0.705         | RF            | GB      | 0.8069        | ET            | GB       | 0.7715        | Anova         | Corr | 0.6732        | ET            | DT   | 0.5688        |               |
| Anova |       | Corr            | 0.6893        | Anova         | GB      | 0.7795        | RF            | GB       | 0.7609        | Anova         | GB   | 0.6581        | RF            | Cos  | 0.5569        |               |
| Anova |       | KNN             | 0.6761        | ET            | DT      | 0.7277        | RFE           | DT       | 0.674         | RF            | DT   | 0.6481        | ET            | Cos  | 0.5552        |               |
| Anova |       | Cos             | 0.6749        | RFE           | DT      | 0.725         | Anova         | DT       | 0.6684        | RFE           | DT   | 0.6396        | Anova         | DT   | 0.5402        |               |
| Anova |       | GB              | 0.6646        | RF            | DT      | 0.716         | ET            | DT       | 0.6563        | ET            | DT   | 0.638         | Anova         | Corr | 0.5335        |               |
| Anova |       | DT              | 0.5911        | Anova         | DT      | 0.6945        | RF            | DT       | 0.6529        | Anova         | DT   | 0.6007        | Anova         | Cos  | 0.5163        |               |
| 32    |       | RFE             | LR            | <b>0.9759</b> | RFE     | ET            | <b>0.9792</b> | RFE      | KNN           | <b>0.8806</b> | RFE  | LR            | <b>0.9685</b> | RFE  | LR            | <b>0.8194</b> |
|       |       | RFE             | ET            | 0.9757        | RF      | ET            | 0.969         | RFE      | RF            | 0.8801        | RFE  | SVM           | 0.9674        | ET   | LR            | 0.7904        |
|       |       | RF              | LR            | 0.9747        | RFE     | RF            | 0.969         | RFE      | ET            | 0.8717        | RFE  | KNN           | 0.966         | RF   | LR            | 0.788         |
|       |       | RFE             | Cos           | 0.9736        | RFE     | KNN           | 0.9689        | RFE      | SVM           | 0.8679        | RFE  | ET            | 0.9646        | RFE  | SVM           | 0.7607        |
|       | RFE   | RF              | 0.9734        | RF            | ET      | 0.9645        | RFE           | LR       | 0.866         | RFE           | RF   | 0.9577        | RFE           | ET   | 0.743         |               |
|       | RFE   | SVM             | 0.9734        | Anova         | ET      | 0.9636        | Anova         | LR       | 0.8538        | ET            | ET   | 0.9518        | ET            | ET   | 0.7278        |               |
|       | ET    | LR              | 0.9683        | ET            | KNN     | 0.9617        | Anova         | SVM      | 0.8528        | RF            | ET   | 0.9504        | RFE           | RF   | 0.7261        |               |
|       | RF    | ET              | 0.9676        | RFE           | SVM     | 0.9602        | RFE           | Corr     | 0.8525        | RF            | LR   | 0.9477        | RF            | ET   | 0.7259        |               |
|       | RFE   | KNN             | 0.9672        | ET            | RF      | 0.9594        | Anova         | KNN      | 0.851         | RF            | RF   | 0.9448        | RFE           | KNN  | 0.7257        |               |
|       | RF    | RF              | 0.9666        | ET            | SVM     | 0.9587        | RFE           | Cos      | 0.85          | ET            | LR   | 0.9438        | RF            | RF   | 0.7209        |               |
|       | RFE   | Corr            | 0.9662        | RF            | KNN     | 0.9583        | RF            | KNN      | 0.8479        | ET            | RF   | 0.9412        | ET            | SVM  | 0.7206        |               |
|       | ET    | RF              | 0.9658        | Anova         | KNN     | 0.9573        | RF            | Corr     | 0.8457        | RF            | SVM  | 0.9395        | RF            | SVM  | 0.7196        |               |
|       | ET    | ET              | 0.9625        | RF            | SVM     | 0.9562        | RF            | LR       | 0.8435        | ET            | SVM  | 0.9384        | ET            | RF   | 0.7159        |               |
|       | RF    | SVM             | 0.9543        | Anova         | RF      | 0.9559        | RF            | RF       | 0.8408        | RF            | KNN  | 0.9352        | RFE           | GB   | 0.7097        |               |
|       | RF    | Cos             | 0.9541        | RF            | RF      | 0.9547        | Anova         | RF       | 0.8406        | ET            | KNN  | 0.9312        | RF            | KNN  | 0.7088        |               |
|       | RF    | Corr            | 0.9524        | ET            | LR      | 0.9543        | ET            | RF       | 0.8402        | RFE           | Corr | 0.9225        | ET            | KNN  | 0.7034        |               |
|       | RF    | KNN             | 0.9462        | RFE           |         |               |               |          |               |               |      |               |               |      |               |               |

- Continued from previous page

|           |           | Marker Set Size | mRNA          | Protein    | microRNA  | SNP          | CNV        |            |               |            |            |               |            |           |               |
|-----------|-----------|-----------------|---------------|------------|-----------|--------------|------------|------------|---------------|------------|------------|---------------|------------|-----------|---------------|
|           | RF        | GB              | 0.9386        | Anova      | Corr      | 0.8922       | ET         | Corr       | 0.8266        | Anova      | SVM        | 0.8053        | RF         | Cos       | 0.592         |
|           | RFE       | DT              | 0.8215        | RF         | Cos       | 0.8918       | ET         | ET         | 0.8257        | Anova      | LR         | 0.7989        | Anova      | RF        | 0.5902        |
|           | Anova     | LR              | 0.8094        | ET         | Corr      | 0.8891       | RF         | Cos        | 0.824         | RF         | GB         | 0.7812        | Anova      | KNN       | 0.5898        |
|           | RF        | DT              | 0.8039        | RF         | Corr      | 0.8803       | ET         | SVM        | 0.8229        | ET         | GB         | 0.765         | Anova      | SVM       | 0.5838        |
|           | ET        | DT              | 0.8033        | RFE        | Corr      | 0.8797       | ET         | Cos        | 0.8186        | Anova      | KNN        | 0.7539        | Anova      | ET        | 0.5825        |
|           | Anova     | SVM             | 0.7995        | ET         | GB        | 0.8238       | Anova      | GB         | 0.7926        | Anova      | GB         | 0.7014        | RFE        | DT        | 0.5797        |
|           | Anova     | ET              | 0.7935        | RF         | GB        | 0.8109       | RFE        | GB         | 0.7897        | RFE        | GB         | 0.6999        | Anova      | GB        | 0.5796        |
|           | Anova     | RF              | 0.7844        | Anova      | GB        | 0.8088       | ET         | GB         | 0.7728        | Anova      | Cos        | 0.6932        | ET         | Cos       | 0.5767        |
|           | Anova     | Cos             | 0.7654        | RFE        | GB        | 0.8087       | RF         | GB         | 0.7563        | Anova      | Corr       | 0.6861        | RF         | DT        | 0.5741        |
|           | Anova     | Corr            | 0.7636        | ET         | DT        | 0.723        | RFE        | DT         | 0.6703        | RF         | DT         | 0.6541        | ET         | DT        | 0.5713        |
|           | Anova     | KNN             | 0.745         | RFE        | DT        | 0.7204       | Anova      | DT         | 0.6658        | ET         | DT         | 0.6461        | Anova      | Corr      | 0.5474        |
|           | Anova     | GB              | 0.7424        | RF         | DT        | 0.7189       | ET         | DT         | 0.6546        | RFE        | DT         | 0.6445        | Anova      | DT        | 0.5452        |
|           | Anova     | DT              | 0.6318        | Anova      | DT        | 0.718        | RF         | DT         | 0.652         | Anova      | DT         | 0.6211        | Anova      | Cos       | 0.5151        |
| <b>64</b> | <b>RF</b> | <b>LR</b>       | <b>0.9789</b> | <b>RFE</b> | <b>ET</b> | <b>0.979</b> | <b>RFE</b> | <b>KNN</b> | <b>0.8746</b> | <b>RFE</b> | <b>KNN</b> | <b>0.9911</b> | <b>RFE</b> | <b>LR</b> | <b>0.8379</b> |
|           | RFE       | LR              | 0.9777        | RFE        | LR        | 0.9782       | RFE        | LR         | 0.8688        | RFE        | LR         | 0.9892        | ET         | LR        | 0.8136        |
|           | RFE       | Cos             | 0.977         | RF         | LR        | 0.9731       | RFE        | RF         | 0.8682        | RF         | LR         | 0.9862        | RF         | LR        | 0.8135        |
|           | RFE       | ET              | 0.976         | RFE        | KNN       | 0.9727       | RF         | LR         | 0.8595        | RFE        | SVM        | 0.9843        | RFE        | SVM       | 0.7658        |
|           | RFE       | RF              | 0.9757        | ET         | ET        | 0.9721       | RF         | Corr       | 0.8585        | ET         | LR         | 0.9837        | RFE        | ET        | 0.7475        |
|           | RF        | RF              | 0.9755        | RF         | ET        | 0.9719       | RFE        | ET         | 0.8578        | RFE        | ET         | 0.9833        | ET         | SVM       | 0.7474        |
|           | ET        | LR              | 0.9741        | ET         | LR        | 0.9706       | RF         | KNN        | 0.8574        | RF         | KNN        | 0.9791        | RF         | SVM       | 0.7471        |
|           | RF        | ET              | 0.9737        | Anova      | ET        | 0.9695       | RFE        | SVM        | 0.8568        | RF         | ET         | 0.9781        | RF         | ET        | 0.7428        |
|           | RFE       | SVM             | 0.9733        | RFE        | RF        | 0.9693       | Anova      | KNN        | 0.8564        | RF         | SVM        | 0.9778        | ET         | ET        | 0.7386        |
|           | ET        | RF              | 0.9728        | RFE        | SVM       | 0.9688       | Anova      | LR         | 0.8557        | RFE        | RF         | 0.9774        | RF         | RF        | 0.7349        |
|           | RFE       | Corr            | 0.9709        | RF         | SVM       | 0.9662       | ET         | LR         | 0.8539        | ET         | KNN        | 0.9766        | ET         | RF        | 0.7331        |
|           | ET        | ET              | 0.9691        | Anova      | LR        | 0.9661       | RFE        | Corr       | 0.8537        | ET         | SVM        | 0.9763        | RFE        | KNN       | 0.73          |
|           | RFE       | KNN             | 0.9656        | ET         | SVM       | 0.9656       | ET         | Corr       | 0.8536        | ET         | ET         | 0.9762        | RFE        | RF        | 0.7295        |
|           | RF        | Cos             | 0.9647        | ET         | KNN       | 0.9635       | ET         | KNN        | 0.852         | RF         | RF         | 0.9748        | RF         | KNN       | 0.7276        |
|           | RF        | Corr            | 0.9631        | RF         | KNN       | 0.9624       | RFE        | Cos        | 0.8492        | ET         | RF         | 0.971         | ET         | KNN       | 0.7225        |
|           | RF        | SVM             | 0.9595        | ET         | RF        | 0.9613       | ET         | RF         | 0.8453        | RFE        | Corr       | 0.9673        | RFE        | Cos       | 0.7157        |
|           | ET        | Cos             | 0.9585        | Anova      | RF        | 0.9609       | RF         | SVM        | 0.8448        | RFE        | Cos        | 0.9612        | RFE        | GB        | 0.7076        |
|           | ET        | Corr            | 0.9576        | RF         | RF        | 0.9608       | Anova      | SVM        | 0.8426        | ET         | Corr       | 0.9233        | RFE        | Corr      | 0.6891        |
|           | RF        | KNN             | 0.9545        | Anova      | SVM       | 0.9601       | RF         | RF         | 0.8424        | RF         | Corr       | 0.9227        | ET         | GB        | 0.6725        |
|           | ET        | GB              | 0.9504        | Anova      | KNN       | 0.9581       | RF         | ET         | 0.8422        | RF         | Cos        | 0.9215        | RF         | GB        | 0.6711        |
|           | ET        | SVM             | 0.9501        | RFE        | Cos       | 0.9167       | ET         | Cos        | 0.8407        | ET         | Cos        | 0.919         | Anova      | LR        | 0.6514        |
|           | RFE       | GB              | 0.9481        | RFE        | Corr      | 0.9028       | ET         | SVM        | 0.8402        | Anova      | RF         | 0.8944        | RF         | Corr      | 0.6502        |
|           | ET        | KNN             | 0.9468        | ET         | Cos       | 0.8968       | Anova      | RF         | 0.8398        | Anova      | ET         | 0.8787        | ET         | Corr      | 0.646         |
|           | RF        | GB              | 0.9464        | RF         | Cos       | 0.8942       | RF         | Cos        | 0.8362        | Anova      | LR         | 0.8479        | RF         | Cos       | 0.6264        |
|           | Anova     | LR              | 0.8924        | Anova      | Cos       | 0.8928       | ET         | ET         | 0.8357        | Anova      | SVM        | 0.8378        | ET         | Cos       | 0.6173        |
|           | Anova     | SVM             | 0.8743        | ET         | Corr      | 0.8851       | Anova      | Cos        | 0.8344        | RF         | GB         | 0.7936        | Anova      | KNN       | 0.6033        |
|           | Anova     | ET              | 0.8733        | RF         | Corr      | 0.8834       | Anova      | ET         | 0.8306        | ET         | GB         | 0.7794        | Anova      | SVM       | 0.6023        |
|           | Anova     | RF              | 0.8705        | Anova      | Corr      | 0.8772       | Anova      | Corr       | 0.815         | Anova      | KNN        | 0.7786        | Anova      | RF        | 0.6015        |
|           | Anova     | GB              | 0.8352        | ET         | GB        | 0.8135       | RFE        | GB         | 0.7897        | RFE        | GB         | 0.7253        | Anova      | GB        | 0.596         |
|           | Anova     | Cos             | 0.8334        | Anova      | GB        | 0.8094       | Anova      | GB         | 0.777         | Anova      | GB         | 0.7214        | Anova      | ET        | 0.5932        |
|           | RFE       | DT              | 0.8292        | RF         | GB        | 0.8085       | ET         | GB         | 0.7689        | Anova      | Cos        | 0.7201        | RFE        | DT        | 0.5803        |
|           | Anova     | KNN             | 0.8273        | RFE        | GB        | 0.805        | RF         | GB         | 0.7496        | Anova      | Corr       | 0.7098        | RF         | DT        | 0.5762        |
|           | ET        | DT              | 0.826         | ET         | DT        | 0.7203       | RFE        | DT         | 0.6553        | RF         | DT         | 0.6653        | ET         | DT        | 0.5708        |
|           | Anova     | Corr            | 0.8226        | RFE        | DT        | 0.7196       | Anova      | DT         | 0.6526        | ET         | DT         | 0.6588        | Anova      | Corr      | 0.5675        |
|           | RF        | DT              | 0.8173        | RF         | DT        | 0.7163       | ET         | DT         | 0.6498        | RFE        | DT         | 0.6502        | Anova      | DT        | 0.5466        |
|           | Anova     | DT              | 0.6803        | Anova      | DT        | 0.7128       | RF         | DT         | 0.646         | Anova      | DT         | 0.6249        | Anova      | Cos       | 0.5222        |
| <b>96</b> | <b>RF</b> | <b>LR</b>       | <b>0.9808</b> | <b>RFE</b> | <b>LR</b> | <b>0.979</b> | <b>RFE</b> | <b>LR</b>  | <b>0.8697</b> | <b>RFE</b> | <b>KNN</b> | <b>0.9933</b> | <b>RFE</b> | <b>LR</b> | <b>0.847</b>  |
|           | RFE       | LR              | 0.9787        | RFE        | LR        | 0.9779       | RF         | KNN        | 0.8657        | RF         | LR         | 0.9918        | ET         | LR        | 0.8292        |
|           | RF        | RF              | 0.9774        | ET         | LR        | 0.9768       | RF         | LR         | 0.8643        | RFE        | LR         | 0.9916        | RF         | LR        | 0.8285        |
|           | RFE       | Cos             | 0.977         | RFE        | ET        | 0.9765       | ET         | LR         | 0.8634        | ET         | LR         | 0.9909        | RFE        | SVM       | 0.7715        |
|           | RFE       | RF              | 0.9762        | ET         | ET        | 0.9734       | RFE        | RF         | 0.8633        | RF         | SVM        | 0.9877        | RF         | SVM       | 0.7653        |
|           | ET        | LR              | 0.9761        | RF         | ET        | 0.973        | RF         | Corr       | 0.863         | RF         | KNN        | 0.9877        | ET         | SVM       | 0.7602        |
|           | ET        | RF              | 0.9758        | Anova      | LR        | 0.971        | ET         | Corr       | 0.8629        | ET         | KNN        | 0.987         | RF         | ET        | 0.7514        |
|           | RF        | ET              | 0.9746        | RF         | SVM       | 0.9675       | RFE        | KNN        | 0.8628        | RFE        | SVM        | 0.9867        | RFE        | ET        | 0.7481        |
|           | RFE       | ET              | 0.9744        | ET         | SVM       | 0.9673       | ET         | KNN        | 0.8613        | RF         | ET         | 0.9857        | ET         | ET        | 0.744         |
|           | RFE       | Corr            | 0.9727        | RFE        | SVM       | 0.9672       | Anova      | KNN        | 0.8596        | RFE        | ET         | 0.9856        | ET         | RF        | 0.7401        |
|           | RFE       | SVM             | 0.9723        | Anova      | ET        | 0.9669       | Anova      | LR         | 0.8573        | ET         | SVM        | 0.9852        | RFE        | KNN       | 0.7387        |
|           | ET        | ET              | 0.9699        | RFE        | RF        | 0.9662       | RFE        | SVM        | 0.853         | ET         | ET         | 0.9831        | RF         | RF        | 0.737         |
|           | RF        | Cos             | 0.966         | ET         | RF        | 0.9624       | ET         | RF         | 0.8483        | RFE        | RF         | 0.9824        | RF         | KNN       | 0.7345        |
|           | RF        | Corr            | 0.9639        | RFE        | KNN       | 0.9623       | RFE        | Corr       | 0.8477        | RF         | RF         | 0.9822        | RFE        | RF        | 0.7336        |
|           | RFE       | KNN             | 0.9632        | RF         | RF        | 0.961        | RF         | SVM        | 0.8474        | RFE        | Corr       | 0.9821        | ET         | KNN       | 0.7292        |
|           | RF        | SVM             | 0.9618        | Anova      | SVM       | 0.9589       | RFE        | ET         | 0.847         | ET         | RF         | 0.9806        | RFE        | Cos       | 0.7264        |
|           | ET        | Cos             | 0.9616        | RF         | KNN       | 0.9584       | ET         | SVM        | 0.8467        | RFE        | Cos        | 0.9777        | RFE        | GB        | 0.7064        |
|           | ET        | Corr            | 0.9611        | Anova      | RF        | 0.9581       | RF         | RF         | 0.8457        | RF         | Corr       | 0.9503        | RFE        | Corr      | 0.7023        |
|           | RF        | KNN             | 0.9561        | ET         | KNN       | 0.9574       | ET         | Cos        | 0.8451        | ET         | Corr       | 0.9488        | RF         | GB        | 0.6797        |
|           | ET        | SVM             | 0.9545        | Anova      | KNN       | 0.9475       | RFE        | Cos        | 0.8425        | RF         | Cos        | 0.9481        | ET         | GB        | 0.6794        |
|           | ET        | KNN             | 0.9487        | RFE        | Cos       | 0.9182       | RF         | ET         | 0.8403        | ET         | Cos        | 0.9476        | RF         | Corr      | 0.6725        |
|           | ET        | GB              | 0.9463        | RFE        | Corr      | 0.9046       | ET         | ET         | 0.8397        | Anova      | RF         | 0.9107        | Anova      | LR        | 0.6693        |
|           | RF        | GB              | 0.9434        | ET         | Cos       | 0.8971       | Anova      | RF         | 0.837         | Anova      | ET         | 0.8999        | ET         | Corr      | 0.6584        |
|           | RFE       | GB              | 0.9425        | RF         | Cos       | 0.8965       | Anova      | Cos        | 0.8354        | Anova      | LR         | 0.883         | RF         | Cos       | 0.6487        |
|           | Anova     | LR              | 0.9157        | Anova      | Cos       | 0.8845       | RF         | Cos        | 0.835         | Anova      | SVM        | 0.8657        | ET         | Cos       | 0.6374        |
|           | Anova     | ET              | 0.8996        | ET         | Corr      | 0.8835       | Anova      | SVM        | 0.8342        | Anova      | KNN        | 0.8057        | Anova      | KNN       | 0.6148        |
|           | Anova     | SVM             | 0.8991        | RF         | Corr      | 0.882        | Anova      | ET         | 0.8302        | RF         | GB         | 0.7923        | Anova      | SVM       | 0.6114        |
|           | Anova     | RF              | 0.8984        | Anova      | Corr      | 0.8713       | Anova      | Corr       | 0.7962        | ET         | GB         | 0.7885        | Anova      | GB        | 0.6097        |
|           | Anova     | KNN             | 0.8578        | RFE        | GB        | 0.8175       | RFE        | GB         | 0.7801        | Anova      | Cos        | 0.7496        | Anova      | RF        | 0.6093        |
|           | Anova     | GB              | 0.8569        | ET         | GB        | 0.8065       | Anova      | GB         | 0.7684        | Anova      | Corr       | 0.738         | Anova      | ET        | 0.5989        |
|           | Anova     | Cos             | 0.8473        | RF         | GB        | 0.8056       | ET         | GB         | 0.7613        | RFE        | GB         | 0.7334        | Anova      | Corr      | 0.5835        |
|           | Anova     | Corr            | 0.836         | Anova      | GB        | 0.8          | RF         | GB         | 0.7462        | Anova      | GB         | 0.7271        | RF         | DT        | 0.5768        |
|           | RFE       | DT              | 0.8329        | RFE        | DT        | 0.7067       | Anova      | DT         | 0.6554        | RF         | DT         | 0.667         | RFE        | DT        | 0.575         |
|           | ET        | DT              | 0.8247        | RF         | DT        | 0.7049       | ET         | DT         | 0.6464        | ET         | DT         | 0.6564        | ET         | DT        | 0.5745        |
|           | RF        | DT              | 0.8173        | ET         | DT        | 0.7038       | RF         | DT         | 0.6461        | RFE        | DT         | 0.6467        | Anova      | DT        | 0.5469        |
|           | Anova     | DT              | 0.6934        | Anova      | DT        | 0.699        | RFE        | DT         | 0.6418        | Anova      | DT         | 0.6282        | Anova      | Cos       | 0.5244        |

Table 6: External Validation: Best performing models

| Marker Set Size | Feature Selection | Classifier          | AUC               |
|-----------------|-------------------|---------------------|-------------------|
| 8               | RFE               | Extra Trees         | 0.938 +/- 0.015   |
| 16              | RFE               | Logistic Regression | 0.9676 +/- 0.112  |
| 32              | RFE               | Logistic Regression | 0.9849 +/- 0.0055 |
| 64              | RFE               | Logistic Regression | 0.9904 +/- 0.0036 |
| 96              | RFE               | Logistic Regression | 0.9920 +/- 0.025  |

The top performing feature selection and classification algorithms selected by AUC in the external validation experiment.

Table 7: External Validation: NCI-60 to TCGA mapping

| NCI-60 Cell Line       | TCGA Cell lines                                                                          |
|------------------------|------------------------------------------------------------------------------------------|
| Central Nervous System | Glioblastoma multiforme (GBM)<br>Brain Lower Grade Glioma (LGG)                          |
| Lung                   | Lung adenocarcinoma (LUAD)<br>Lung squamous cell carcinoma (LUSC)                        |
| Colon                  | Colon adenocarcinoma (COAD)<br>Rectum adenocarcinoma (READ)                              |
| Ovarian                | Serous Cystadenocarcinoma (OV)                                                           |
| Renal                  | Kidney renal clear cell carcinoma (KIRC)<br>Kidney renal papillary cell carcinoma (KIRP) |

This table indicates which feature selection and classification algorithm was ranked highest by AUC during the model selection and training phase of the external validation experiment.

Table 8: Accuracy per Cancer Type Grouped by Marker Set Size

| TCGA | Samples | Marker Set Size | ME     | NCI-60 Cell Lines |        |        |        |        |        |     |     |  |  |
|------|---------|-----------------|--------|-------------------|--------|--------|--------|--------|--------|-----|-----|--|--|
|      |         |                 |        | LE                | CO     | CNS    | RE     | BR     | OV     | LC  |     |  |  |
| CNS  | 8       | 0.0             | 0.0    | 0.0               | 1.0    | 0.0    | 0.0    | 0.0    | 0.0    | 0.0 | 0.0 |  |  |
| CO   | 8       | 0.0144          | 0.0048 | 0.1779            | 0.0769 | 0.0048 | 0.0192 | 0.4135 | 0.2885 |     |     |  |  |
| LC   | 8       | 0.0291          | 0.0058 | 0.0058            | 0.3081 | 0.1977 | 0.0174 | 0.0    | 0.436  |     |     |  |  |
| OV   | 8       | 0.4074          | 0.1852 | 0.0               | 0.0    | 0.0    | 0.0    | 0.0    | 0.4074 |     |     |  |  |
| RE   | 8       | 0.0             | 0.0    | 0.0649            | 0.7013 | 0.0    | 0.0    | 0.1039 | 0.1299 |     |     |  |  |
| CNS  | 16      | 0.0             | 0.0    | 0.0               | 0.8246 | 0.1754 | 0.0    | 0.0    | 0.0    |     |     |  |  |
| CO   | 16      | 0.0             | 0.0    | 0.9856            | 0.0    | 0.0144 | 0.0    | 0.0    | 0.0    |     |     |  |  |
| LC   | 16      | 0.0             | 0.0058 | 0.064             | 0.0523 | 0.1512 | 0.0407 | 0.0    | 0.686  |     |     |  |  |
| OV   | 16      | 0.0             | 0.2222 | 0.037             | 0.0    | 0.0    | 0.0    | 0.037  | 0.7037 |     |     |  |  |
| RE   | 16      | 0.013           | 0.026  | 0.0649            | 0.0519 | 0.7403 | 0.013  | 0.0649 | 0.026  |     |     |  |  |
| CNS  | 32      | 0.0             | 0.0877 | 0.0               | 0.9123 | 0.0    | 0.0    | 0.0    | 0.0    |     |     |  |  |
| CO   | 32      | 0.0             | 0.0    | 1.0               | 0.0    | 0.0    | 0.0    | 0.0    | 0.0    |     |     |  |  |
| LC   | 32      | 0.0             | 0.0581 | 0.2151            | 0.1279 | 0.2791 | 0.0814 | 0.0    | 0.2384 |     |     |  |  |
| OV   | 32      | 0.0             | 0.7037 | 0.1481            | 0.0    | 0.0    | 0.037  | 0.1111 | 0.0    |     |     |  |  |
| RE   | 32      | 0.0             | 0.0779 | 0.0               | 0.013  | 0.8571 | 0.0    | 0.039  | 0.013  |     |     |  |  |
| CNS  | 64      | 0.0             | 0.386  | 0.0               | 0.5965 | 0.0175 | 0.0    | 0.0    | 0.0    |     |     |  |  |
| CO   | 64      | 0.0             | 0.0    | 1.0               | 0.0    | 0.0    | 0.0    | 0.0    | 0.0    |     |     |  |  |
| LC   | 64      | 0.0             | 0.0872 | 0.064             | 0.0058 | 0.7035 | 0.0233 | 0.0    | 0.1163 |     |     |  |  |
| OV   | 64      | 0.0             | 0.4074 | 0.1481            | 0.0    | 0.1111 | 0.0741 | 0.0741 | 0.1852 |     |     |  |  |
| RE   | 64      | 0.013           | 0.0909 | 0.0               | 0.0    | 0.8961 | 0.0    | 0.0    | 0.0    |     |     |  |  |
| CNS  | 96      | 0.0             | 0.4386 | 0.0               | 0.5351 | 0.0263 | 0.0    | 0.0    | 0.0    |     |     |  |  |
| CO   | 96      | 0.0             | 0.0    | 1.0               | 0.0    | 0.0    | 0.0    | 0.0    | 0.0    |     |     |  |  |
| LC   | 96      | 0.0             | 0.1802 | 0.2209            | 0.0174 | 0.5233 | 0.0465 | 0.0    | 0.0116 |     |     |  |  |
| OV   | 96      | 0.0             | 0.4074 | 0.2222            | 0.0741 | 0.037  | 0.0    | 0.2593 | 0.0    |     |     |  |  |
| RE   | 96      | 0.0             | 0.0    | 0.0               | 0.0    | 1.0    | 0.0    | 0.0    | 0.0    |     |     |  |  |

This table indicates the percentage of each TCGA cancer type that was classified to each NCI-60 cell line.

The TCGA samples are grouped by marker set size. These predictions were made using the model specified in Supplemental Table 6.
